# Supplementary material
Source: PubMed Central journal article supplement (PMC3072431)
Supplement: NIHMS283703-supplement-suppl_fig2.pdf [file NIHMS283703-supplement-suppl_fig2.pdf]

Supplemental Figure 2. Effects of increasing concentrations of free calcium ions on OsCDase activity. Values are means  $\pm$  S.D of three replicates.

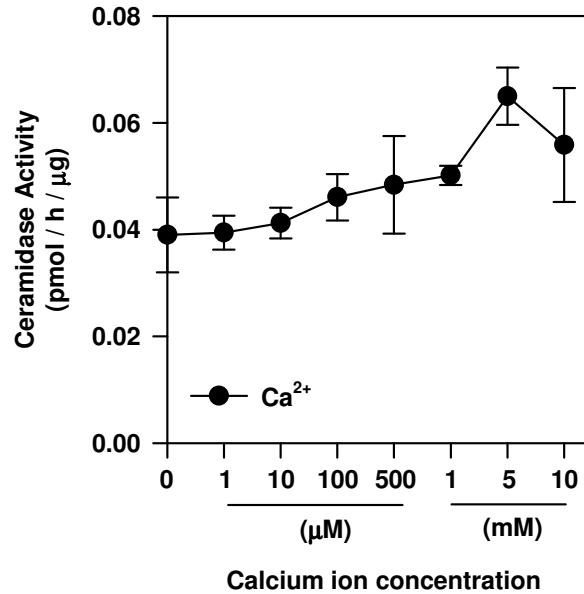

Methods: To determine the effects increasing concentrations of calcium ions OsCDase activity. Concentrations of free calcium ions from 1  $\mu$ M to 10 mM were used in 100 mM phosphate (pH 5.7) buffer with 1 mM EGTA. Free calcium ion concentrations were calculated using WEBMAXC software (<http://www.stanford.edu/~cpatton/webmaxc/webmaxce.htm>).

Results: The data indicated that OsCDase activity was only weakly stimulated in micromolar concentrations of free calcium ions. Significant activation of OsCDase activity was observed at 5 mM free calcium ions (*t*-test,  $p < 0.01$ ).
